# Forecasting COVID-19 infection trends and new hospital admissions in England due to SARS-CoV-2 Variant of Concern Omicron

Alberto Giovanni Gerli,<sup>1</sup> <https://orcid.org/0000-0003-4511-6878>  
Stefano Centanni,<sup>2,3</sup> <https://orcid.org/0000-0001-9923-535X>  
Joan B Soriano,<sup>4,5,6</sup> <http://orcid.org/0000-0001-9740-2994>  
Julio Ancochea<sup>4,5,6</sup> <https://orcid.org/0000-0001-7451-4133>

<sup>1</sup> Department of Health Sciences, Università degli Studi di Milano, Milan, Italy

<sup>2</sup> Respiratory Unit, aSST Santi Paolo e Carlo, San Paolo Hospital, Milan, Italy

<sup>3</sup> Department of Health Sciences, University of Milan, Milan, Italy

<sup>4</sup> Servicio de Neumología, Hospital Universitario La Princesa, Madrid, Spain

<sup>5</sup> Facultad de Medicina, Universidad Autónoma de Madrid, Madrid, Spain

<sup>6</sup> Centro de Investigación en Red de Enfermedades Respiratorias (CIBERES), Instituto de Salud Carlos III (ISCIII), Madrid, Spain

## Correspondence to:

Dr Joan B Soriano  
Servicio de Neumología, 6ª planta  
Hospital Universitario de la Princesa  
Diego de León 62, 28006-Madrid, Spain  
Email: [jbsoriano2@gmail.com](mailto:jbsoriano2@gmail.com)

**Date:** December 29, 2021

**Wordcount:** 1,138 words

**Abstract wordcount:** 254 words

**Number of references:** 20

**Number of figures:** 1

**Keywords:** COVID-19; forecast; hospitalizations; Omicron; trends

**Funding:** none

47 **Abstract:**

48

49 **Objectives:** On November 26, 2021, WHO designated the variant B.1.1.529 as a new  
50 SARS-CoV-2 variant of concern (VoC), named Omicron, originally identified in South  
51 Africa. Several mutations in Omicron indicate that it may have an impact on how it  
52 spreads, resistance to vaccination, or the severity of illness it causes. We used our  
53 previous modelling algorithms to forecast the spread of Omicron in England.

54

55 **Design:** We followed EQUATOR’s TRIPOD guidance for multivariable prediction models.

56

57 **Setting:** England.

58

59 **Participants:** Not applicable.

60

61 **Interventions:** Non-interventional, observational study with a predicted forecast of  
62 outcomes.

63

64 **Main outcome measures:** Trends in daily COVID-19 cases with a 7-day moving average  
65 and of new hospital admissions.

66

67 **Methods:** Modelling included a third-degree polynomial curve in existing  
68 epidemiological trends on the spread of Omicron and a new Gaussian curve to  
69 estimate a downward trend after a peak in England.

70

71 **Results:** Up to February 15, 2022, we estimated a projection of 250,000 COVID-19 daily  
72 cases of Omicron spread in the worse scenario, and 170,000 in the “best” scenario.  
73 Omicron might represent a relative increase from the background daily rates of COVID-  
74 19 infection in England of mid December 2021 of 1.9 to 2.8-fold. With a 5-day lag-time,  
75 daily new hospital admissions would peak at around 5,063 on January 23, 2022 in the  
76 worse scenario.

77

78 **Conclusion:** This warning of pandemic surge of COVID-19 due to Omicron is calling for  
79 further reinforcing in England and elsewhere of universal hygiene interventions (indoor  
80 ventilation, social distance, and face masks), and anticipating the need of new total or  
81 partial lockdowns in England.

82

83 **Text:**

84

85 England has been among the hardest hit countries by COVID-19 worldwide, particularly  
86 during the ongoing sixth wave.<sup>1</sup> There have been several successful attempts to  
87 forecast trends of incidence and mortality of COVID-19, most based upon knowledge  
88 on viral dynamics from previous pandemics, recent COVID-19 geographical information  
89 of diverse granularity, and newly discovered viral characteristics.<sup>2,3</sup> However, SARS-  
90 CoV-2 inherent poor quality RNAm copy-editing gene replication makes it prone to  
91 mutate and spontaneously create new variants of concern (VoC),<sup>4</sup> that adapt to any  
92 hostile environment, produce new outbreaks, and modify existing epidemiological  
93 projections.<sup>5</sup>

94

95 On November 26, 2021, WHO designated the variant B.1.1.529 as a new VoC, named  
96 Omicron, originally identified in South Africa, on the advice of WHO's Technical  
97 Advisory Group on Virus Evolution.<sup>6</sup> This decision was based on the evidence that  
98 Omicron has several mutations that may have an impact on how it spreads, resistance  
99 to vaccination, or the severity of illness it causes.<sup>7,8</sup> In particular, in South Africa up to  
100 December 2, 2021 it was observed a doubling time for the first 3 days after the wave  
101 threshold of ten cases per 100 000 population.<sup>9,10</sup>

102

103 In Denmark, considered a European leader in sequencing SARS-CoV-2 VoC, where  
104 testing of all positive PCR tests is commonplace, cases of Omicron have been reported  
105 to double every second day.<sup>11</sup> There, almost 75% of those infected by Omicron had  
106 received full (two doses of) COVID-19 vaccination already. On the positive side, it  
107 appears most Omicron-related COVID-19 cases are mild or even pauci-symptomatic.

108

109 We used our previous modelling algorithms,<sup>12,13,14,15</sup> to forecast the spread of Omicron  
110 in England, and report trends in COVID-19 daily cases with a 7-day moving average and  
111 of new hospitalizations. We followed EQUATOR's TRIPOD guidance for multivariable  
112 prediction models.<sup>16</sup> By applying firstly a third-degree polynomial curve in existing  
113 epidemiological trends on the spread of Omicron in England, starting from the first 17  
114 days of the Omicron outbreak (from December, 8, 2021), and secondly a Gaussian  
115 curve following a parametric growth,<sup>12-15</sup> we were able to model new infections of  
116 COVID-19 in England. Overall, the "best" scenario forecasts up to 170,800 COVID-19  
117 daily infections up to February 15, 2022 while the worse scenario is 257,167 (**Figure 1**).

118

119 Then we modelled these trends for new COVID-19 hospital admissions using a new  
120 Gaussian curve to estimate a downward trend after a peak,<sup>17</sup> and we obtained the  
121 expected curve of new COVID-19 infections in England, and with a 5-day lag time, new  
122 hospital admissions. Omicron will likely produce crowding of hospitals in England, as  
123 new hospital admissions per day will peak on January 23, 2022, with a range in  
124 between 3,416 ("best" scenario) and 5,063 (worse scenario). Both epidemiological  
125 indicators will surpass rates observed in the previous five waves in England, unless  
126 both individual and group interventions are taking place.

127

128 In probability theory, the conditional expectation of any warning system for an  
129 eventual surge of an infectious outbreak, as could happen with Omicron substituting

130 other SAR-CoV-2 VoC, modifies (reduces) the eventual magnitude of the event itself.<sup>18</sup>  
131 Given preliminary evidence from South Africa, our forecast anticipates a large COVID-  
132 19 burden increase in England despite the high levels of vaccination.<sup>19</sup> Therefore, this  
133 warning is calling for further reinforcing of universal hygiene interventions (indoor  
134 ventilation, social distance, and face masks), and anticipating the need of new  
135 lockdowns,<sup>11</sup> the latter being extremely detrimental to the economy.  
136  
137 All viruses change in time and space by natural or artificial Darwin's selection, and  
138 survival of the fittest,<sup>20</sup> due either to high levels of herd immunity or low vaccination  
139 coverage, respectively. The toll associated with VoC Omicron underlines WHO's  
140 COVID-19 message that: "No one will be safe, until the entire World is safe (ergo  
141 vaccinated)".  
142

143 **Figure 1:** Trends in COVID-19 daily new infections with a seven-day moving average  
144 and of new hospital admissions in England, observed and expected up to February 15,  
145 2022  
146

## 147 References

- <sup>1</sup> World Health Organization. WHO Coronavirus (COVID-19) Dashboard. <https://covid19.who.int> Date last accessed: December 27, 2021.
- <sup>2</sup> Giordano G, Blanchini F, Bruno R, Colaneri P, Di Filippo A, Di Matteo A, Colaneri M. Modelling the COVID-19 epidemic and implementation of population-wide interventions in Italy. *Nat Med*. 2020 Jun;26(6):855-860. doi: 10.1038/s41591-020-0883-7. Epub 2020 Apr 22. PMID: 32322102
- <sup>3</sup> Nadella P, Swaminathan A, Subramanian SV. Forecasting efforts from prior epidemics and COVID-19 predictions. *Eur J Epidemiol*. 2020 Aug;35(8):727-729. doi: 10.1007/s10654-020-00661-0. Epub 2020 Jul 17. PMID: 32676971
- <sup>4</sup> Nextstrain. Genomic epidemiology of novel coronavirus – global subsampling. <https://nextstrain.org/ncov/gisaid/global> Date last accessed: December 27, 2021.
- <sup>5</sup> García-Basteiro AL, Chaccour C, Guinovart C, Llupià A, Brew J, Trilla A, Plasencia A. Monitoring the COVID-19 epidemic in the context of widespread local transmission. *Lancet Respir Med*. 2020 May;8(5):440-442. doi: 10.1016/S2213-2600(20)30162-4. Epub 2020 Apr 2. PMID: 32247325
- <sup>6</sup> Update on Omicron. WHO. <https://www.who.int/news/item/28-11-2021-update-on-omicron> Date last accessed: December 27, 2021.
- <sup>7</sup> Torjesen I. Covid-19: Omicron may be more transmissible than other variants and partly resistant to existing vaccines, scientists fear. *BMJ*. 2021 Nov 29;375:n2943. doi: 10.1136/bmj.n2943. PMID: 34845008
- <sup>8</sup> Callaway E, Ledford H. How bad is Omicron? What scientists know so far. *Nature*. 2021 Dec;600(7888):197-199. doi: 10.1038/d41586-021-03614-z. PMID: 34857948
- <sup>9</sup> Karim SSA, Karim QA. Omicron SARS-CoV-2 variant: a new chapter in the COVID-19 pandemic. *Lancet*. 2021 Dec 3;S0140-6736(21)02758-6. doi: 10.1016/S0140-6736(21)02758-6. Online ahead of print. PMID: 34871545
- <sup>10</sup> Department of Health, Government of South Africa. COVID-19. Dec 2, 2021. <https://sacoronavirus.co.za/> (accessed Dec 2, 2021).
- <sup>11</sup> Denmark's Omicron Surge Is a Warning to the Rest of World. By Niclas Rolander. Bloomberg <https://www.bloomberg.com/news/articles/2021-12-10/denmark-s-omicron-surge-is-a-warning-to-the-rest-of-world> Date last accessed: December 13, 2021.
- <sup>12</sup> Sotgiu G, Gerli AG, Centanni S, Miozzo M, Canonica GW, Soriano JB, Virchow JC. Advanced forecasting of SARS-CoV-2-related deaths in Italy, Germany, Spain, and New York State. *Allergy*. 2020 Jul;75(7):1813-1815. doi: 10.1111/all.14327. Epub 2020 May 11. PMID: 32306406
- <sup>13</sup> Gerli AG, Centanni S, Miozzo MR, Virchow JC, Sotgiu G, Canonica GW, Soriano JB. COVID-19 mortality rates in the European Union, Switzerland, and the UK: effect of timeliness, lockdown rigidity, and population density. *Minerva Med*. 2020 Aug;111(4):308-314. doi: 10.23736/S0026-4806.20.06702-6. Epub 2020 Jun 2. PMID: 32491297
- <sup>14</sup> Gerli AG, Centanni S, Miozzo M, Sotgiu G. Predictive models for COVID-19-related deaths and infections. *Int J Tuberc Lung Dis*. 2020 Jun 1;24(6):647-650. doi: 10.5588/ijtld.20.0196. PMID: 32552999
- <sup>15</sup> Gerli AG, Centanni S, Soriano JB, Ancochea J. Forecasting COVID-19 infection trends in the EU-27 countries, the UK and Switzerland due to SARS-CoV-2 Variant of Concern Omicron (Preprint) 2021 medRxiv: <https://medrxiv.org/cgi/content/short/2021.12.16.21267785v1>

<sup>16</sup> Transparent reporting of a multivariable prediction model for individual prognosis or diagnosis (TRIPOD): The TRIPOD statement <https://www.equator-network.org/reporting-guidelines/tripod-statement/> (accessed Dec 14, 2021).

<sup>17</sup> Dhamodharavadhani S, Rathipriya R. COVID-19 mortality rate prediction for India using statistical neural networks and gaussian process regression model. *Afr Health Sci*. 2021 Mar;21(1):194-206. doi: 10.4314/ahs.v21i1.26. PMID: 34394298

<sup>18</sup> Billingsley, Patrick (1995). "Section 34. Conditional Expectation". *Probability and Measure* (3rd ed.). John Wiley & Sons. p. 445. ISBN 0-471-00710-2.

<sup>19</sup> Rae M. Omicron: a failure to act with a global focus will continue the proliferation of new variants of covid-19. *BMJ*. 2021 Dec 16;375:n3095. doi: 10.1136/bmj.n3095. PMID: 34916212

<sup>20</sup> Wang R, Chen J, Wei GW. Mechanisms of SARS-CoV-2 Evolution Revealing Vaccine-Resistant Mutations in Europe and America. *J Phys Chem Lett*. 2021 Dec 7:11850-11857. doi: 10.1021/acs.jpcclett.1c03380. Online ahead of print. PMID: 34873910

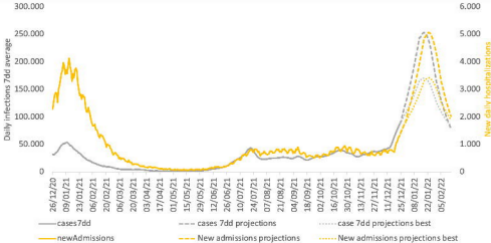

Source: https://medrxiv.org/content/medrxiv/early/2021/12/30/2021.12.29.21268521.full.pdf
